# Supplementary material for: Application of Machine Learning and Neural Networks to Predict the Yield of Cereals, Legumes, Oilseeds and Forage Crops in Kazakhstan
Source: MDPI journal article supplement (doi:10.3390/agriculture13061195), 2023-06-03
Supplement: s1 [file s1]

## Supplementary Materials

```
pd.options.mode.chained_assignment = None
df = pd.read_excel('../Field data.xlsx', sheet_name='Grain legume crop')
df_ur = pd.read_excel('../Yields.xlsx', sheet_name='Grain legume crop')
```

Figure S1: Calculating the average temperature.

```
sum_column = (df['Max. deg. C'] + df['Min. deg. C'])/2
df['Average C'] = sum_column
float_data = df[['NDVI', 'Average deg. C', 'Surface ground humidity (%)', 'Root zone humidity (%)', 'Wind speed (m/s)', 'Humidity (%)', 'Precipitation (mm)', 'Date']].copy(deep=True)
df_NDVI = float_data[float_data['NDVI'] != '-' & (float_data['Surface Moisture (%)'] != '-')]
df_NDVI['Moisture of topsoil (%)'] = df_NDVI['Moisture of topsoil (%)'].astype('float64')
df_NDVI['moisture in the root zone (%)'] = df_NDVI['moisture in the root zone (%)'].astype('float64')
df_NDVI['NDVI'] = df_NDVI['NDVI'].astype('float64')
df_NDVI.info()
```

Figure S2: Sorting and cleaning the database.

```
x = df_NDVI['NDVI']
y = df_NDVI.drop(['Root zone humidity (%)', 'Humidity (%)', 'Precipitation (mm)', 'Date', 'NDVI'], axis=1)
X_train, X_test, y_train, y_test = train_test_split(y, x, test_size=0.1, random_state=10)
```

Figure S3: Dividing the database into a training database and a test database.

```
def predict(model):
    model.fit(X_train, y_train)
    y_pred = model.predict(X_test)
    mse = mean_squared_error(y_test, y_pred)
    rmse = mean_squared_error(y_test, y_pred, squared=False)
    pred_y_df=pd.DataFrame({'Actual':y_test, 'Predicted':y_pred, 'Diff': y_test-y_pred}).reset_index(drop=True)
    pred_y_df.loc[pred_y_df['Diff'] < 0, 'Diff'] = pred_y_df['Diff'] * -1
    print(pred_y_df)
    print('mse =', mse)
    print('rmse =', rmse)
```

Figure S4: code snippet of predict() function.

```
df1 = df[(df['Date'] > '2017-04-01') & (df['Date'] < '2017-07-01')]
df2 = df[(df['Date'] > '2018-04-01') & (df['Date'] < '2018-07-01')]
df3 = df[(df['Date'] > '2019-04-01') & (df['Date'] < '2019-07-01')]
df4 = df[(df['Date'] > '2020-04-01') & (df['Date'] < '2020-07-01')]
df5 = df[(df['Date'] > '2021-04-01') & (df['Date'] < '2021-07-01')]
df6 = df[(df['Date'] > '2022-04-01') & (df['Date'] < '2022-07-01')]
df = pd.concat([df1, df2, df3, df4, df5, df6])
```

Figure S5. Creating a Pandas database with yields.

Table S1: Results of yield predictions.

| <b>Culture</b>    | <b>Activation functions</b> | <b>Output for the entire growing season</b>                                                                                   | <b>Output for the sowing and harvesting period</b>                                                                            |
|-------------------|-----------------------------|-------------------------------------------------------------------------------------------------------------------------------|-------------------------------------------------------------------------------------------------------------------------------|
| Grain legume crop | LinearRegression            | Prediction - 15.5938294<br>Actual value- 13<br>Accuracy – 80.05%<br>MSE –<br>6.72795094257164<br>RMSE -<br>2.5938293973528097 | Prediction - -14.22348<br>Actual value- 13<br>Accuracy – 90,69%<br>MSE –<br>741.1178862516509<br>RMSE -<br>27.223480421350445 |
|                   | Ridge regression            | Prediction - 9.76738<br>Actual value- 13<br>Accuracy – 75.14%<br>MSE –<br>10.44983519437905<br>RMSE -<br>3.2326204841241495   | Prediction - 9.909979<br>Actual value- 13<br>Accuracy – 76.24%<br>MSE –<br>9.548229598906833<br>RMSE -<br>3.090020970625739   |
|                   | Dummy Regressor             | Prediction - 9.75<br>Actual value- 13<br>Accuracy – 75%<br>MSE – 10.5625<br>RMSE – 3.25                                       | Prediction - 9.75<br>Actual value- 13<br>Accuracy – 75%<br>MSE – 10.5625<br>RMSE – 3.25                                       |

| <b>Culture</b> | <b>Activation functions</b> | <b>Output for the entire growing season</b>                                                                                | <b>Output for the sowing and harvesting period</b>                                                                      |
|----------------|-----------------------------|----------------------------------------------------------------------------------------------------------------------------|-------------------------------------------------------------------------------------------------------------------------|
|                | Support Vector Regression   | Prediction - 10.06618338<br>Actual value- 13<br>Accuracy – 77.43%<br>MSE – 8.607279934754404<br>RMSE – 2.9338166157335746  | Prediction - 10.626944<br>Actual value- 13<br>Accuracy – 81.75%<br>MSE – 5.631392475571471<br>RMSE – 2.3730555146417185 |
|                | Multi-layer Perceptron      | Prediction - 11.98386956<br>Actual value- 13<br>Accuracy – 92.2%<br>MSE – 1.0325210703580439<br>RMSE – 1.0161304396375712  | Prediction - 14.210564<br>Actual value- 13<br>Accuracy – 90.69%<br>MSE – 1.4654656756540216<br>RMSE – 1.21056419724607  |
|                | Polynomial regression       | Prediction - 13.27294033<br>Actual value- 13<br>Accuracy – 97.1%<br>MSE – 0.07449642166540053<br>RMSE – 0.2729403261986043 | Prediction - 5.072371<br>Actual value- 13<br>Accuracy – 39.02%<br>MSE – 62.84730925222773<br>RMSE – 7.9276294850495965  |

| <b>Culture</b> | <b>Activation functions</b> | <b>Output for the entire growing season</b>                                                                                  | <b>Output for the sowing and harvesting period</b>                                                                           |
|----------------|-----------------------------|------------------------------------------------------------------------------------------------------------------------------|------------------------------------------------------------------------------------------------------------------------------|
|                | RandomForest                | Prediction - 10.56<br>Actual value- 13<br>Accuracy – 81.24%<br>MSE –<br>5.953599999999998<br>RMSE –<br>2.439999999999995     | Prediction - 10.44<br>Actual value- 13<br>Accuracy – 80.31%<br>MSE –<br>6.553600000000003<br>RMSE –<br>2.5600000000000005    |
| Oilseed crop   | LinearRegression            | Prediction - 1.520977<br>Actual value- 12<br>Accuracy – 12.68%<br>MSE –<br>109.8099127645022<br>RMSE -<br>10.479022509972111 | Prediction - 16.348741<br>Actual value- 12<br>Accuracy – 63.77%<br>MSE –<br>18.91154813203163<br>RMSE -<br>4.348740982403026 |
|                | Ridge regression            | Prediction - 9.742192<br>Actual value- 12<br>Accuracy – 81.19%<br>MSE –<br>5.097697268824957<br>RMSE -<br>2.2578080673132863 | Prediction - 9.652679<br>Actual value- 12<br>Accuracy – 80.44%<br>MSE –<br>5.509914232524477<br>RMSE -<br>2.3473206497035033 |
|                | Dummy Regressor             | Prediction - 9.75<br>Actual value- 12<br>Accuracy – 81.25%<br>MSE – 5.0625<br>RMSE – 2.25                                    | Prediction - 9.75<br>Actual value- 12<br>Accuracy – 81.25%<br>MSE – 5.0625<br>RMSE – 2.25                                    |

| <b>Culture</b> | <b>Activation functions</b> | <b>Output for the entire growing season</b>                                                                                 | <b>Output for the sowing and harvesting period</b>                                                                         |
|----------------|-----------------------------|-----------------------------------------------------------------------------------------------------------------------------|----------------------------------------------------------------------------------------------------------------------------|
|                | Support Vector Regression   | Prediction - 9.521013<br>Actual value- 13<br>Accuracy – 79.35%<br>MSE – 6.14537575213908<br>RMSE – 2.4789868398479005       | Prediction - 9.223484<br>Actual value- 12<br>Accuracy – 76.87%<br>MSE – 7.70904144022213<br>RMSE – 2.7765160615818907      |
|                | Multi-layer Perceptron      | Prediction - 11.908672<br>Actual value- 12<br>Accuracy – 99.24%<br>MSE – 0.008340833505743486<br>RMSE – 0.09132816381458397 | Prediction - 11.662348<br>Actual value- 12<br>Accuracy – 97.19%<br>MSE – 0.11400863071989471<br>RMSE – 0.33765164107389545 |
|                | Polynomial regression       | Prediction - 8.163432<br>Actual value- 12<br>Accuracy – 68.03%<br>MSE – 14.719252202183062<br>RMSE – 3.8365677632726705     | Prediction - 12.612762<br>Actual value- 12<br>Accuracy – 94.9%<br>MSE – 0.37547682708455027<br>RMSE – 0.6127616396973217   |

| <b>Culture</b> | <b>Activation functions</b> | <b>Output for the entire growing season</b>                                                                                       | <b>Output for the sowing and harvesting period</b>                                                                            |
|----------------|-----------------------------|-----------------------------------------------------------------------------------------------------------------------------------|-------------------------------------------------------------------------------------------------------------------------------|
|                | RandomForest                | Prediction - 9.72<br>Actual value- 12<br>Accuracy – 81%<br>MSE –<br>5.198399999999997<br>RMSE –<br>2.2799999999999994             | Prediction - 9.32<br>Actual value- 12<br>Accuracy – 87.67%<br>MSE –<br>7.182399999999999<br>RMSE –<br>2.6799999999999997      |
| Feed crop      | LinearRegression            | Prediction - 10.953747<br>Actual value- 11<br>Accuracy – 99.58%<br>MSE –<br>0.002139336554443382<br>RMSE -<br>0.04625296265584922 | Prediction - 20.642508<br>Actual value- 11<br>Accuracy – 12.35%<br>MSE –<br>92.97795891221809<br>RMSE -<br>9.642507916108656  |
|                | Ridge regression            | Prediction - 13.521812<br>Actual value- 11<br>Accuracy – 77.08%<br>MSE –<br>6.359537081122683<br>RMSE -<br>2.521812261276141      | Prediction - 13.448367<br>Actual value- 11<br>Accuracy – 77.75%<br>MSE –<br>5.994503265610556<br>RMSE -<br>2.4483674694805426 |
|                | Dummy Regressor             | Prediction - 13.5<br>Actual value- 11<br>Accuracy – 78.28%<br>MSE – 6.25<br>RMSE – 2.5                                            | Prediction - 13.5<br>Actual value- 11<br>Accuracy – 78.28%<br>MSE – 6.25<br>RMSE – 2.5                                        |

| <b>Culture</b> | <b>Activation functions</b> | <b>Output for the entire growing season</b>                                                                                      | <b>Output for the sowing and harvesting period</b>                                                                            |
|----------------|-----------------------------|----------------------------------------------------------------------------------------------------------------------------------|-------------------------------------------------------------------------------------------------------------------------------|
|                | Support Vector Regression   | Prediction - 13.572706<br>Actual value- 11<br>Accuracy – 76.62%<br>MSE –<br>6.618817691836597<br>RMSE –<br>2.572706297235772     | Prediction - 13.531542<br>Actual value- 11<br>Accuracy – 76.99%<br>MSE –<br>6.408702453498788<br>RMSE –<br>2.531541517237825  |
|                | Multi-layer Perceptron      | Prediction - 14.767129<br>Actual value- 11<br>Accuracy – 65.76%<br>MSE –<br>14.191262648073945<br>RMSE –<br>3.767129231666196    | Prediction - 17.247889<br>Actual value- 11<br>Accuracy – 43.21%<br>MSE –<br>39.03611787495848<br>RMSE –<br>6.247889073515829  |
|                | Polynomial regression       | Prediction - 10.84963<br>Actual value- 11<br>Accuracy – 98.64%<br>MSE –<br>0.022611029170841374<br>RMSE –<br>0.15036964178597145 | Prediction - 12.363653<br>Actual value- 11<br>Accuracy – 87.6%<br>MSE –<br>1.8595503529438493<br>RMSE –<br>1.3636533111256135 |

| <b>Culture</b> | <b>Activation functions</b> | <b>Output for the entire growing season</b>                                                                                   | <b>Output for the sowing and harvesting period</b>                                                                            |
|----------------|-----------------------------|-------------------------------------------------------------------------------------------------------------------------------|-------------------------------------------------------------------------------------------------------------------------------|
|                | RandomForest                | Prediction - 13.8<br>Actual value- 11<br>Accuracy – 74.55%<br>MSE –<br>7.8400000000000004<br>RMSE –<br>2.8000000000000007     | Prediction - 12.81<br>Actual value- 11<br>Accuracy – 83.55%<br>MSE –<br>3.2761000000000002<br>RMSE –<br>1.8100000000000005    |
| Cereal crop    | LinearRegression            | Prediction - 15.117106<br>Actual value- 11<br>Accuracy – 62.58%<br>MSE –<br>16.950565499966554<br>RMSE -<br>4.117106447490343 | Prediction - 12.084224<br>Actual value- 11<br>Accuracy – 80.15%<br>MSE –<br>1.1755407184616784<br>RMSE -<br>1.08422355557407  |
|                | Ridge regression            | Prediction - 13.773203<br>Actual value- 11<br>Accuracy – 74.79%<br>MSE –<br>7.690655543695103<br>RMSE -<br>2.773203119804805  | Prediction - 13.688406<br>Actual value- 11<br>Accuracy – 75.56%<br>MSE –<br>7.227527653053278<br>RMSE -<br>2.6884061547789386 |
|                | Dummy Regressor             | Prediction - 13.75<br>Actual value- 11<br>Accuracy – 75%<br>MSE – 7.5625<br>RMSE – 2.75                                       | Prediction - 13.75<br>Actual value- 11<br>Accuracy – 75%<br>MSE – 7.5625<br>RMSE – 2.75                                       |



| <b>Culture</b> | <b>Activation functions</b> | <b>Output for the entire growing season</b>                                                                              | <b>Output for the sowing and harvesting period</b>                                                                      |
|----------------|-----------------------------|--------------------------------------------------------------------------------------------------------------------------|-------------------------------------------------------------------------------------------------------------------------|
|                | Support Vector Regression   | Prediction - 13.531542<br>Actual value- 11<br>Accuracy – 76.09%<br>MSE – 6.408702453498788<br>RMSE – 2.531541517237825   | Prediction - 13.875316<br>Actual value- 11<br>Accuracy – 73.87%<br>MSE – 8.267444720784995<br>RMSE – 2.875316455763608  |
|                | Multi-layer Perceptron      | Prediction - 12.774175<br>Actual value- 11<br>Accuracy – 83.88%<br>MSE – 3.1476964349157988<br>RMSE – 1.7741748602986682 | Prediction - 13.007714<br>Actual value- 11<br>Accuracy – 82.75%<br>MSE – 4.030916501289399<br>RMSE – 2.007714247917118  |
|                | Polynomial regression       | Prediction - 15.006737<br>Actual value- 11<br>Accuracy – 63.6%<br>MSE – 16.053942018825378<br>RMSE – 4.006737078824287   | Prediction - 13.939934<br>Actual value- 11<br>Accuracy – 75.28%<br>MSE – 8.643211310139888<br>RMSE – 2.9399338955391308 |

| <b>Culture</b> | <b>Activation functions</b> | <b>Output for the entire growing season</b>                                                                             | <b>Output for the sowing and harvesting period</b>                                     |
|----------------|-----------------------------|-------------------------------------------------------------------------------------------------------------------------|----------------------------------------------------------------------------------------|
|                | RandomForest                | Prediction - 13.8<br>Actual value- 11<br>Accuracy – 72.1%<br>MSE –<br>9.424900000000001<br>RMSE –<br>3.0700000000000003 | Prediction - 13.5<br>Actual value- 11<br>Accuracy – 78.28%<br>MSE – 6.25<br>RMSE – 2.5 |
